# Supplementary material
Source: Springer Nature journal article supplement (https://www.springermedizin.de/resource/supplementary/13229_2012_55_MOESM6_ESM.pdf/9676070)

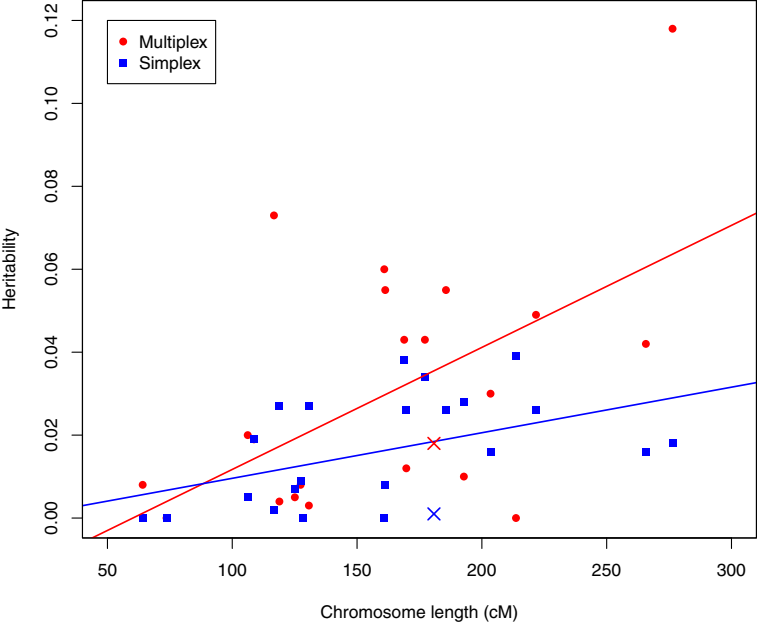

Supplement: MOESM6 [file 9676070]
